# Supplementary material
Source: Elsevier journal article supplement (https://authors.library.caltech.edu/67339/3/mmc2.xlsx)
Supplement: mmc2 [file mmc2.xlsx]

## Sheet: TableS1
Table S1. Calculation of polysaccharide composition based on linkage analysis. Related to Figure 2.							Linkages by groups:
Polysaccharide and expected linkages	Monosaccharide-linkage assignment	Arabidopsis AIR (mol%)			Comments			clv3-2			clv3-2
		Leaf (WT, Col-0)*	SAM	Flower	f= furanose, p= pyranose. (AG = arabinogalactan; RG = rhamnogalacturonan; HG= homogalacturonan; XG = xyloglucan).	Ara = Arabinose		SAM	Flower		SAM	Flower
					*Leaf data are from Pettolino et al. 2012. SAM and flower data are from this study.	Fuc = Fucose	t-Ara (f)	10.5	8.9	t-Glc (p)	0.5	0.6
			(clv3-2)	(clv3-2)		Xyl = Xylose	t-Ara (p)	0.6	0.1	1,3-Glc (p)	0.3	0.2
Arabinan						Rha = Rhamnose	1,3-Ara (f)	0.8	0.6	1,4-Glc (p)	34.4	42.7
5-Ara	All 5-Ara(f)	1.6	9.5	9.7	More likely to occur predominantly in arabinan	Man = Mannose	1,2-Ara (f)	0.4	0.3	1,3,4-Glc (p)	0.3	0.3
2,5-Ara	All 2,5-Ara(f)	0.4	0.7	0.7		Glc = Glucose	1,5-Ara (f)	9.5	9.7	1,2,4-Glc (p)	0.4	0.9
3,5-Ara	All 3,5-Ara(f)	0	1.8	2.1		Gal = Galactose	1,3,5-Ara (f)	1.8	2.1	1,4,6-Glc (p)	3.9	3.7
t-Ara(f)	Equivalent to branch points. 2,5- & 3,5-Ara(f); subtract value from t-Ara(f)	0.3	2.5	2.8	Can be assigned across classes based on branch points	GlcA = Glucuronic Acid	1,2,5-Ara (f)	0.7	0.7	1,3,4,6-Glc (p)	0.2	0.1
Total Arabinan		2.3	14.5	15.3		GalA = Galacturonic Acid	t-Fuc (p)	0.4	0.8	t-Gal (p)	2.8	2.3
Type I AG							t-Xyl (p)	3.4	3.1	1,3-Gal (p)	0.3	0.2
4-Gal	All 4-Gal	1.5	2.7	5.1			1,2-Xyl (p)	1.5	1	1,2-Gal (p)	1	0.9
3,4-Gal	All 3,4-Gal	0.3	-	-			1,4-Xyl (p)	2.7	2.9	1,4-Gal (p)	2.7	5.1
4,6-Gal	All 4,6-Gal	0.3	0.3	0.1			1,2,4-Xyl (p)	0.3	0.3	1,6-Gal (p)	1.6	1.3
t-Ara(f)	Equivalent to branch points. 3,4-Gal + 2,4-Gal; subtract value from t-Ara(f)	0.6	0.3	0.1			1,3,4-Xyl (p)	0.2	0.1
Total Type I AG		2.7	3.3	5.3			1,2,3,4-Xyl (p)	0.5	0.3
Type II AG							1,2-Rha (p)	0.3	0.3	1,4,6-Gal (p)	0.3	0.1
3-Gal	All 3-Gal	0.7	0.3	0.2			1,2,4-Rha (p)	0.9	0.6	1,3,6-Gal (p)	1.8	1.2
6-Gal	All 6-Gal	0.3	1.6	1.3			t-Man (p)	0.2	0.2	1,3,4,6-Gal (p)	0.1	0.1
2-Ara	All 2-Ara	1.3	0.4	0.3	More likely to occur predominantly in Type II AG		1,4-Man (p)	2.1	1.9	t-Glc A(p)	0.7	0.5
3,6-Gal	All 3,6-Gal	0.4	1.8	1.2			1,4,6-Man (p)	0.6	0.4	t-Gal A (p)	0.7	0.6
3,4,6-Gal	All 3,4,6-Gal	0	0.1	0.1						1,4-Gal A (p)	10.8	5.1
t-Rha	All t-Rha	0.2	-	-	Assign to Type II AG due to low expected RGII levels					1,3,4-Gal A (p)	0.1	0
t-Ara(f)/(p)	Equivalent to branch points less t-Rha. 3,6-Gal + 2x(3,4,6-Gal - t-Rha; subtract value from t-Ara(f) (some t-GlcA, (+/- 4-O-Me) and t-Gal could also contribute to terminals but in this case sufficient t-Ara(f)	0.2	2	1.4
Total Type II AG		3.3	6.3	4.6
RG I
2-Rha	All 2-Rha	2.5	0.3	0.3
2,4-Rha	All 2,4-Rha	2.1	0.9	0.6
3,4-GalA	All 3,4-GalA	0.6	1	0
4-GalA	Equivalent to total Rha assigned to RGI less 3,4-GalA. 2-Rha + 2,4-Rha - 3,4-GalA; subtract from 4-GalA	4	0.2	0.9
Total RG I		9.2	2.4	1.8
HG
4-GalA	All remaining 4-GalA	24.7	10.6	4.2
t- GalA	All t-GalA	0.8	0.7	0.6	Assign to HG
Total HG		25.5	11.3	4.8
Total Pectin		43	37.8	31.8
Xylan
4-Xyl	All 4-Xyl	2.1	2.7	2.9
2,4-Xyl	All 2,4-Xyl	0.7	0.3	0.3
3,4-Xyl	All 3,4-Xyl	1	0.2	0.1
2,3,4-Xyl	All 2,3,4-Xyl	0.3	0.5	0.3	Absence of other undermethylated sugars (hexitol hexa-acetates) suggests xylan assignment; also dependent on wall type
t-GlcA	t-GlcA (All; must be ≤ total branch points. 2,4- + 3,4- + 2(2,3,4-))	1.6	0.7	0.5
Total Xylan		5.7	4.4	4.1
Heteromannan (HM) (galacto)glucomannan					note t-Man has multiple sources, including N-glycans on glycoproteins
4-Man	All 4-Man	1.2	2.1	1.9
4,6-Man	All 4,6-Man	0.2	0.6	0.4
4-Glc	Equivalent to 4-Man (must be ≤ total 4-Glc); subtract from 4-Glc	1.2	2.1	1.9	Starch depleted cell walls, therefore assign to structural polysaccharides; no MLG expected in these cell walls, commelinoid monocots only; assignment to XG, HM and cellulose based on the presence and levels of 4,6-Man for HM and 4,6-Glc for XG
t-Gal	Equivalent to branch points. 4,6-Man; subtract value from t-Gal	0.2	0.6	0.4
Total HM		2.8	5.4	4.6
XG
4,6-Glc	All remaining 4,6-Glc	3.1	3.9	3.7	Starch depleted cell walls, therefore assign to structural polysaccharides, therefore primarily XG
4-Glc	Equivalent to 4,6-Glc (must be ≤ total 4,6-Glc remaining)	3.1	3.9	3.7
2-Xyl	All 2-Xyl (must be ≤ branch points. 4,6-Glc assigned to XG)	1	1.5	1	Assign to XG due to low RGII levels expected
2-Gal	All 2-Gal (must be ≤ 2-Xyl assigned to XG)	0.8	1	0.9
t-Fuc	All t-Fuc (must be ≤ 2-Gal assigned to XG)	0.7	0.4	0.8
t-Xyl	Equivalent to branch points less assigned terminal residues. 4,6-Glc - t-Fuc	2.4	3.4	2.9
Total XG		11.1	14.1	13
Total non-cellulosic		19.6	23.9	21.7
Cellulose					note t-Glc has multiple sources
4-Glc	All remaining 4-Glc. Total 4-Glc - 4-Glc assigned to XG + HM	29.7	29.4	37.1
Total Cellulose		29.5	29.4	37.1
Others	Sum of any remaining linkages not assigned	7.9	8.9	9.4
	Total	100	100	100
